# Supplementary material
Source: PubMed Central journal article supplement (PMC3158234)
Supplement: 1103214108_pnas.201103214SI.pdf [file 1103214108_pnas.201103214SI.pdf]

# Supporting Information

Warthen et al. 10.1073/pnas.1103214108

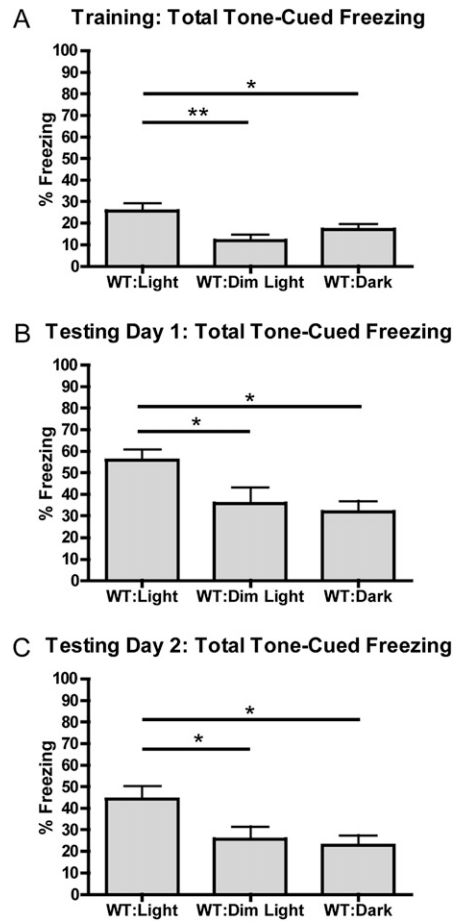

**Fig. S1.** Dim light is not sufficient to enhance freezing in WT mice. Dim light (*Materials and Methods*, main text) does not enhance freezing relative to darkness during conditioning (A), testing day 1 (B), or testing day 2 (C) (Dim Light,  $n = 11$ ; Dark,  $n = 17$ ). Standard light (Light) does enhance freezing relative to dim light and darkness on all days of the protocol (Light,  $n = 17$ ). \* $P < 0.05$ , \*\* $P < 0.01$ . Data are presented as average percentage freezing  $\pm$  SEM.

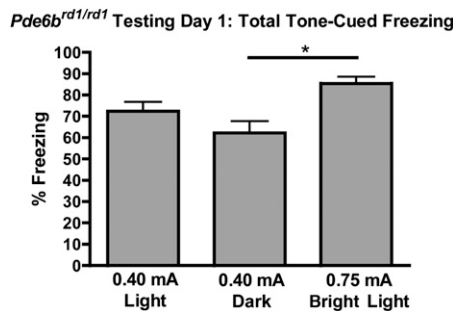

**Fig. S2.** Freezing responses in *Pde6b*<sup>rd1/rd1</sup> mice are not saturated under the standard experimental paradigm. *Pde6b*<sup>rd1/rd1</sup> mice conditioned with an intense training protocol ( $n = 4$ ) freeze significantly more than *Pde6b*<sup>rd1/rd1</sup> mice conditioned under our standard protocol in darkness ( $n = 10$ ). \* $P < 0.05$ . Data are presented as average percentage freezing  $\pm$  SEM.
